# Supplementary material for: Low-Intensity Pretransplant Therapy in Acute Myeloid Leukemia: A 13-Year Single-Center Experience
Source: Research Square preprint supplement (doi:10.21203/rs.3.rs-7651424/v1), 2025-10-15
Supplement: Supplementary file 1 [file 721afb1f35d4fb7a730ac8a6.docx]

|  | HMA (n=42) | HMA+Ven (n=24) | Upfront (n=40) |
| --- | --- | --- | --- |
| acute GVHD, grade II-IV (n, %) | 17 (40) | 13 (52) | 12 (30) |
| chronic GVHD, moderate/severe (n, %) | 5 (12) | 6 (25) | 10 (25) |
| CMV reactivation (n, %) | 17 (40) | 5 (21) | 18 (45) |
| 100-days mortality (n, %) | 10 (24) | 1 (4) | 0 (0) |

**Supplementary Table 1 – Post transplant complications**

| Legend: HMA: hypomethylating agent, Ven: venetoclax, GVHD: graft versus host disease, CMV: cytomegalovirus |
| --- |
